# Supplementary material
Source: publisher site journal article supplement (https://www.spandidos-publications.com/7636/downloadSupplementary)
Supplement: Supplementary file 1 [file downloadSupplementary]

Table S1. Primer sequences for qPCR, siRNA and cloning.

| A, LINC00467          |                                               |
|-----------------------|-----------------------------------------------|
| Primer direction      | Primer sequence (5'-3')                       |
| qPCR primer F         | CCTTCTTCCTCATCATCGTC                          |
| qPCR primer R         | CCCAGTTTCAGTCCCTCTTG                          |
| pGL6-miR WT primer F  | CGGGATCCGTGGCGTAGGCCGGACATTCTAGT              |
| pGL6-miR WT primer R  | CCCAAGCTTAATTTCCAAACTCTTATTATGTGG             |
| pGL6-miR MUT primer F | GAGGACCAGGAATTACTAAAACAGGTTGTTTCTCTGCAGTTTC   |
| pGL6-miR MUT primer R | GAAACTGCAGAGAAACAACCTGTTTTAGTAATTCCTGGTCCTC   |
| si-R1-F               | CAGGGAGGUUUAUAGACATT                          |
| si-R1-R               | UGUCUAUUAACCUCUGTT                            |
| si-R2-F               | GGCUGGCAAAUAUGAAGGUTT                         |
| si-R2-R               | ACCUUCAUUAUUGCCAGCCTT                         |
| si-R3-F               | AGCCAGACAGAUUCAAGUATT                         |
| si-R3-R               | UACUUGAAUCUGUCUGGCUTT                         |
| si-NC-F               | GAAUGGACGUAGGUUAAUUCTT                        |
| si-NC-R               | GAUUAACCUACGUCCAUUCTT                         |
| B, DPYSL3             |                                               |
| Primer direction      | Primer sequence (5'-3')                       |
| qPCR primer F         | CCTCGGCATAGATGGAACCC                          |
| qPCR primer R         | CAGCAAGGAGTTGATGTAGTCC                        |
| pGL6-miR WT primer F  | CGGGATCCGCAAGCCTTCCTCAAAGAGAGGGGC             |
| pGL6-miR WT primer R  | CCCTCGAGCTGCCTGTAAGAGAGGCCCTTCAT              |
| pGL6-miR MUT primer F | TCTTCCACCTGACCATATTTCTACTGACCTGCTCAGGCCTCTTTC |
| pGL6-miR MUT primer R | AAAGAGGCCTGAGCAGGTCAGTAGAAATATGGTCAGGTGGAAGAA |
| siRNA-DPYSL3-F        | GAGGCAGAAUCGUCAAUGATT                         |
| siRNA-DPYSL3-R        | UCAUUGACGAUUCUGCCUUCTT                        |
| siNC-F                | TGAGUCAGCAGGUAAGUACUU                         |
| siNC-R                | GUACUUACCUGCUGACUCAUU                         |
| C, miR-141-3p         |                                               |
| Primer direction      | Primer sequence (5'-3')                       |
| miR-141-3p mimics-F   | UAACACUGUCUGGUAAAAGAUGG                       |
| miR-141-3p mimics-R   | AUCUUUACCAGACAGUGUUACC                        |
| miR-141-3p inhibitors | CCAUCUUUACCAGACAGUGU                          |
| miR-NC mimics-F       | UUCUCCGAACGUGUCACGUTT                         |
| miR-NC mimics-R       | ACGUGACACGUUCGGAGAATT                         |
| miR-NC inhibitors     | ACGUGAACGUUCGGAGAAATT                         |
| D, GAPDH              |                                               |
| Primer direction      | Primer sequence (5'-3')                       |
| qPCR primer F         | GCACCGTCAAGGCTGAGAAC                          |
| qPCR primer R         | GCCTTCTCCATGGTGGTGAA                          |
| E, U6                 |                                               |
| Primer direction      | Primer sequence (5'-3')                       |
| Reverse primer        | CGCTTACGAATTTGCGTGTTCAT                       |
| qPCR primer F         | GCTTCGGCAGCACATATACTAAAAT                     |
| qPCR primer R         | CGCTTACGAATTTGCGTGTTCAT                       |
